# Supplementary material for: Designed construction of hierarchical NiCo2S4@polypyrrole core–shell nanosheet arrays as electrode materials for high-performance hybrid supercapacitors
Source: Royal Society of Chemistry journal article supplement (doi:10.1039/c6ra28693c), 2017-01-01
Supplement: c6ra28693c1.pdf [file c6ra28693c1.pdf]

## Supporting Information for

### **Designed Construction of Hierarchical NiCo<sub>2</sub>S<sub>4</sub>@Polypyrrole Core-Shell Nanosheet Arrays as Electrode Materials for High-Performance Hybrid Supercapacitors**

Shaojie Chen<sup>1</sup>, Yefeng Yang<sup>1\*</sup>, Ziyue Zhan<sup>1</sup>, Jinlei Xie<sup>1</sup> and Jie Xiong<sup>1\*</sup>

<sup>1</sup>Department of Materials Engineering, Zhejiang Sci-Tech University, Hangzhou 310018, P. R. China

Email address: [yangyf@zstu.edu.cn](mailto:yangyf@zstu.edu.cn) (Dr. Y. Yang); [jxiong@zstu.edu.cn](mailto:jxiong@zstu.edu.cn) (Prof. J. Xiong)

Tel: +86-571-8684 3586

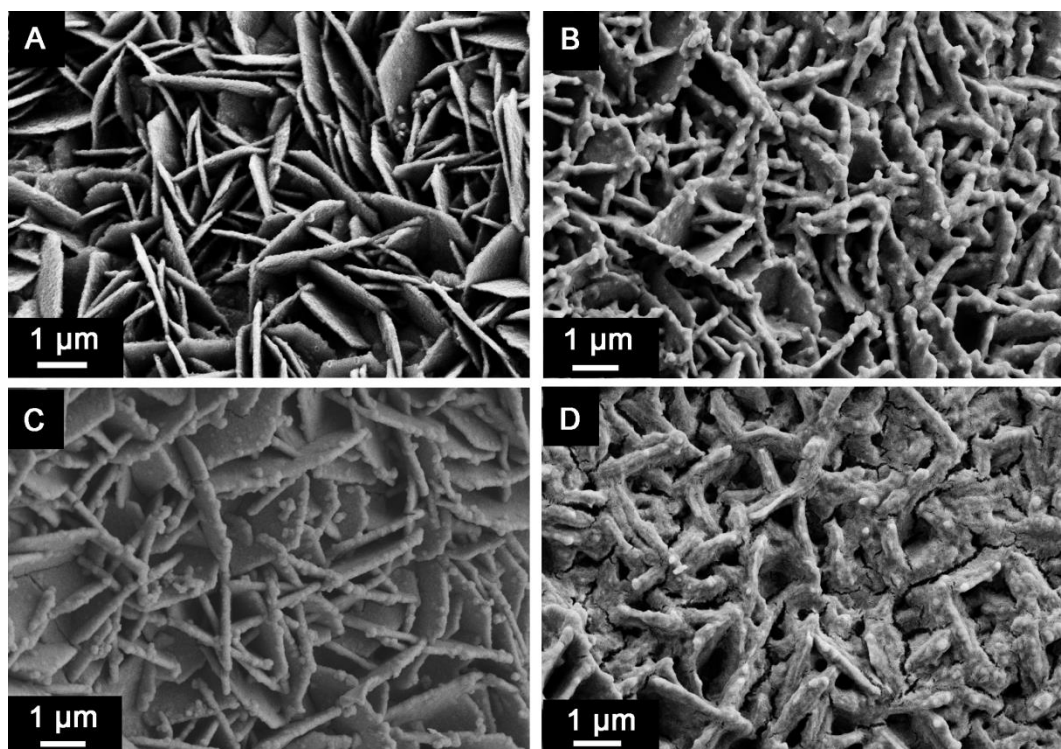

**Figure S1.** Typical SEM images of different NiCo<sub>2</sub>S<sub>4</sub>@PPy electrodes with different reaction time of PPy coating: (A) 100 s with PPy loading of 0.5 mg/cm<sup>2</sup>, (B) 200 s with PPy loading of 1.6 mg/cm<sup>2</sup>, (C) 300 s with PPy loading of 2.4 mg/cm<sup>2</sup>, and (D) 500 s with PPy loading of 4.2 mg/cm<sup>2</sup>.

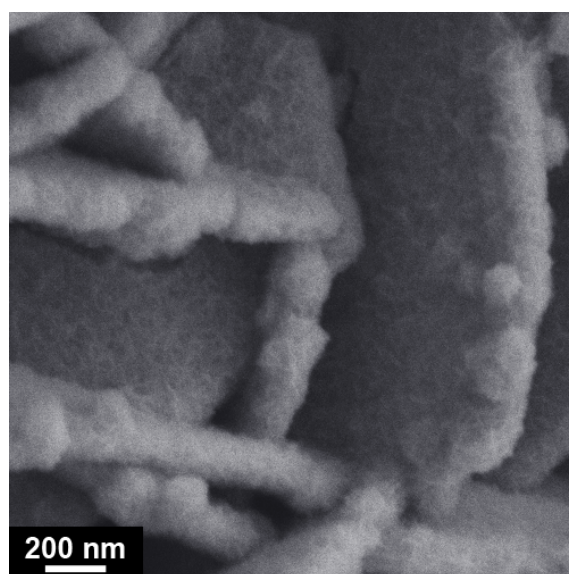

**Figure S2.** Enlarged SEM image of the NiCo<sub>2</sub>S<sub>4</sub>@PPy core-shell NSAs.

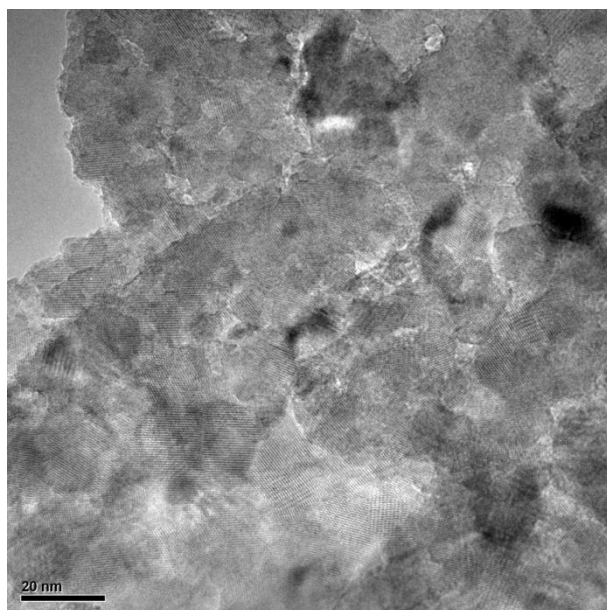

**Figure S3.** HRTEM image of an individual NiCo<sub>2</sub>S<sub>4</sub> nanosheet.

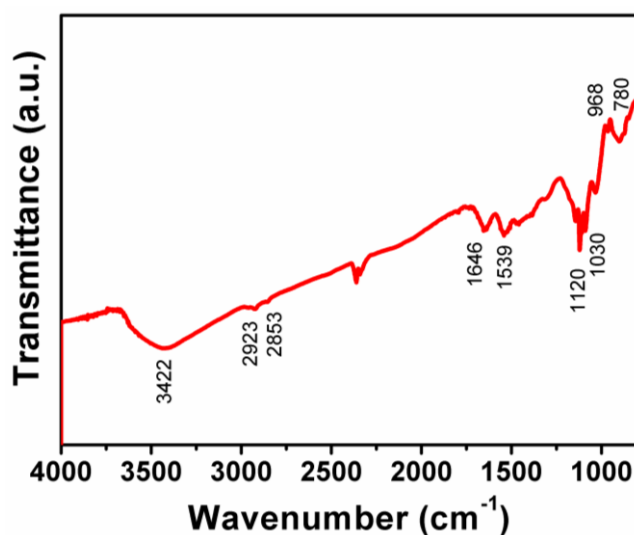

**Figure S4.** FTIR spectra of NiCo<sub>2</sub>S<sub>4</sub>@PPy sample. The peaks at 2923 and 2853 cm<sup>-1</sup> can be assigned to the N-H bond in the aromatic amines; the peak at 1646 cm<sup>-1</sup> is due to the C=C/C-C vibration; the peak at 1539 cm<sup>-1</sup> is attributed to the symmetric stretching vibration of C=C bond in PPy rings; the peaks at 1120 and 1030 cm<sup>-1</sup> are associated with C-N stretching vibration and N-H in-plane vibration; the peaks at 968 and 780 cm<sup>-1</sup> indicate the presence of polymerized pyrrole.

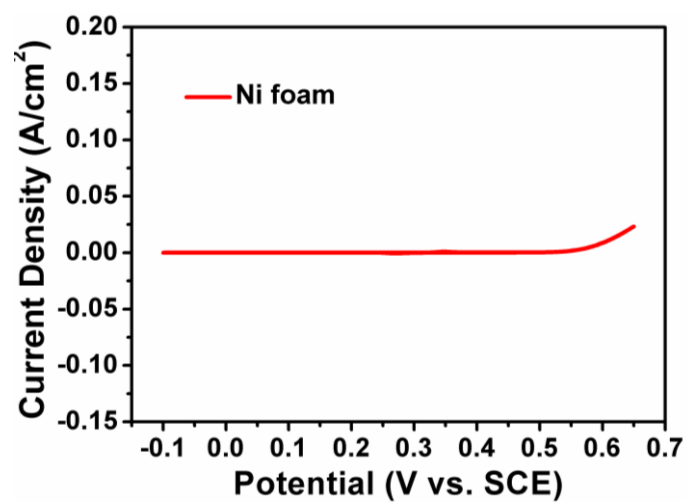

**Figure S5.** CV curve of the Ni foam substrate at a scan rate of 10 mV/s.

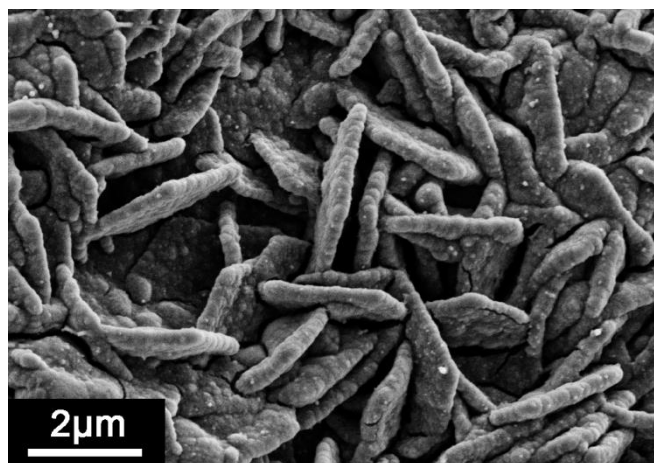

**Figure S6.** SEM image of the NiCo<sub>2</sub>S<sub>4</sub>@PPy electrode obtained from the HSC device after 3000 cycles.
